# Supplementary material
Source: PubMed Central journal article supplement (PMC11029529)
Supplement: 262_2013_1516_MOESM1_ESM.pdf [file 262_2013_1516_MOESM1_ESM.pdf]

## **Supplementary Materials**

Cancer Immunology, Immunotherapy (submitted in 2013) – Volker Lennerz et al.

## Supplementary MIATA information

|                    |            |                                                                                                                                                                                                                                                                                                                                                                                                                                                                                                                                                                                                                                                                                                                                                                                                                                                                                                                                                                                                                                                                                                                                                                                                                                                                                                                                                                                                                                                                                                                                                                                                                                                                                                                                                                  |
|--------------------|------------|------------------------------------------------------------------------------------------------------------------------------------------------------------------------------------------------------------------------------------------------------------------------------------------------------------------------------------------------------------------------------------------------------------------------------------------------------------------------------------------------------------------------------------------------------------------------------------------------------------------------------------------------------------------------------------------------------------------------------------------------------------------------------------------------------------------------------------------------------------------------------------------------------------------------------------------------------------------------------------------------------------------------------------------------------------------------------------------------------------------------------------------------------------------------------------------------------------------------------------------------------------------------------------------------------------------------------------------------------------------------------------------------------------------------------------------------------------------------------------------------------------------------------------------------------------------------------------------------------------------------------------------------------------------------------------------------------------------------------------------------------------------|
| Information on.... |            |                                                                                                                                                                                                                                                                                                                                                                                                                                                                                                                                                                                                                                                                                                                                                                                                                                                                                                                                                                                                                                                                                                                                                                                                                                                                                                                                                                                                                                                                                                                                                                                                                                                                                                                                                                  |
| ...the sample      | Patients   | <ul style="list-style-type: none"> <li>• Demographic data: Supplementary Table 4</li> <li>• Disposition: Supplementary Figure 1</li> <li>• HLA types: HLA-A1, HLA-A2, HLA-A3, HLA-A24, HLA-B7</li> <li>• Disease: patients had a variety of different solid survivin expressing cancers</li> <li>• Treatment: vaccination with EMD640744 in Montanide ISA 51 VG (see Figure 1 for treatment schedule)</li> <li>• Co-medication: none</li> </ul>                                                                                                                                                                                                                                                                                                                                                                                                                                                                                                                                                                                                                                                                                                                                                                                                                                                                                                                                                                                                                                                                                                                                                                                                                                                                                                                  |
|                    | Techniques | <ul style="list-style-type: none"> <li>• Whole blood collection and PBMC processing was done in the five Swiss study centers by trained personnel;</li> <li>• 95 ml whole blood was obtained by venipuncture using Li-Heparin blood collection tubes at time points indicated in Figure 1 (if applicable: leukaphereses at baseline and week 12);</li> <li>• PBMC were isolated using Ficoll density gradient centrifugation with Leukosep separation tubes (Greiner Bio-one, #227290); whole blood was not diluted; leukaphereses were diluted 1:2 with PBS/EDTA;</li> <li>• PBMC were frozen in FCS/10% DMSO at <math>1 \times 10^7</math>/vial using 2-propanol-filled cryobox freezing containers (Nalgene, #5100-0001) at <math>-80^\circ\text{C}</math> overnight and afterwards stored in liquid nitrogen until transport to the experimental laboratories in Mainz and Erlangen</li> <li>• PBMC were transported from study centers to experimental labs on dry ice within 24 hours</li> <li>• Upon arrival, all shipped vials were controlled for completeness and proper condition, and the vials were rapidly transferred to liquid nitrogen for storage until use; (every step of the shipment was monitored, respective data loggers were signed and sent to the study sponsor and a monitoring agency)</li> <li>• After thawing, before applied to the respective assays, PBMC were counted by trypan-blue staining, adjusted to <math>2 \times 10^6</math>/ml in AIM and rested overnight in an incubator to remove dead as well as apoptotic cells;</li> <li>• Number and quality of PBMC was determined after ON-incubation again by trypan-blue staining and flow cytometry analyses; results are shown in Supplementary Figure 2A;</li> </ul> |

| ELISpot              |                                                                            |                                                                                                                                                                                                                                                                                                                                                                                                                                                                                                                                                                                                                                                                                                                                                                                                                                                                                                                                                                                                                                                                                                                                                                                                                                                                                                                                        |
|----------------------|----------------------------------------------------------------------------|----------------------------------------------------------------------------------------------------------------------------------------------------------------------------------------------------------------------------------------------------------------------------------------------------------------------------------------------------------------------------------------------------------------------------------------------------------------------------------------------------------------------------------------------------------------------------------------------------------------------------------------------------------------------------------------------------------------------------------------------------------------------------------------------------------------------------------------------------------------------------------------------------------------------------------------------------------------------------------------------------------------------------------------------------------------------------------------------------------------------------------------------------------------------------------------------------------------------------------------------------------------------------------------------------------------------------------------|
| ....the assay        | evELISpot<br><br>ivsELISpot<br><br>Reagents<br><br>Materials/<br>Equipment | <ul style="list-style-type: none"> <li>• <i>ex vivo</i> (ev)ELISpot assays are described in the Methods section; controls were PHA controls and a CMV/EBV peptide (CE-) mix (11 peptides binding to the relevant HLA alleles); responses are summarized in Supplementary Figure 2C; all spot counts were calculated as spot forming cells (SFC) per <math>10^5</math> CD8+ T cells, CD3/CD8 stains of all samples are shown in Supplementary Figure 2B;</li> <li>• <i>in vitro stimulated</i> (ivs)ELISpot assays (described in Methods)</li> <li>• Reagents: ELISpot antibodies were Mab1-D1K and Mab7-B6-1-Biotin (Mabtech), assay medium was AIM V (Invitrogen) w/o serum; culture medium for short term T cell cultures was AIM V supplemented with 10% pooled human serum from healthy donors; Phytohaemagglutinin (PHA, Murex Biotech); CE peptide mix was received from JPT peptide technologies; EMD640744 and single peptides were supplied by the sponsor; antiCD3- and antiCD8 FACS antibodies were from BD Biosciences; media and sera were pretested for performance;</li> <li>• Materials/equipment: assay plates were MultiScreen Filterplates MSIP S4510 (Millipore); cell incubators, centrifuges and laminar flow cabinets were state-of-the-art devices for the sterile handling of human cell material;</li> </ul> |
| ....data acquisition | Machines/<br>Software<br><br>Calibration<br><br>ELISpot<br>analyses        | <ul style="list-style-type: none"> <li>• ELISpot assays were analyzed using the KS Elispot Automated Reader System (Zeiss) running analysis software KS Elispot 4.9; Flow Cytometry analysis was done using the FACS Canto II Flow Cytometer (BD Biosciences) equipped with FACS Diva software; for Flow Cytometry analyses, FlowJo 7.5 was used; machines were calibrated according to the manufacturers recommendations on a regular basis (FACS Canto once per week, KS Elispot approx. once per month);</li> <li>• Spot analysis was performed exclusively by well trained and experienced persons; all well pictures were saved at high resolution to enable re-analysis of all data; back-ups of all analyzed data were saved on separate hard drives;</li> </ul>                                                                                                                                                                                                                                                                                                                                                                                                                                                                                                                                                                |
| ....results          | Response criteria                                                          | <ul style="list-style-type: none"> <li>• For evELISpot assays, a response was scored positive when the spot number was <math>\geq 10</math> <u>and</u> two-fold higher than background (PBMC only) <u>and</u> two-fold higher than the standard deviation of all combined negative values; for significance testing the student's T Test was applied to the calculation of p-values;</li> <li>• For ivsELISpot assays, responses of microcultures were scored positive when spot</li> </ul>                                                                                                                                                                                                                                                                                                                                                                                                                                                                                                                                                                                                                                                                                                                                                                                                                                            |

|                               |                                      |                                                                                                                                                                                                                                                                                                                                                                                                                                                                                                                                                                                                                                                                                                                                                                                                                                                                                                                                                                                                                                                                                                                                                                                                                                         |
|-------------------------------|--------------------------------------|-----------------------------------------------------------------------------------------------------------------------------------------------------------------------------------------------------------------------------------------------------------------------------------------------------------------------------------------------------------------------------------------------------------------------------------------------------------------------------------------------------------------------------------------------------------------------------------------------------------------------------------------------------------------------------------------------------------------------------------------------------------------------------------------------------------------------------------------------------------------------------------------------------------------------------------------------------------------------------------------------------------------------------------------------------------------------------------------------------------------------------------------------------------------------------------------------------------------------------------------|
|                               | Auditing                             | <p>numbers were at least two times higher than the average values of the background control plates (COS-7/HLA-transfectants);</p> <ul style="list-style-type: none"> <li>Analyzed plates were checked for unexpected results (artifacts, high reactivity to negative control wells etc.) or discrepancies between spot counts and the visual impression of the respective wells; wells with very high spot numbers showing confluent spots were set arbitrarily to 500 or 1000 (only in cases where wells were completely coated with stain);</li> <li>Since objective clinical response rates are generally low after cancer vaccination, clinical efficacy can only be reasonably assessed in an appropriately designed trial with a time-to-event endpoint. Therefore, a formal analysis to correlate clinical efficacy with immunologic efficacy was not planned.</li> </ul>                                                                                                                                                                                                                                                                                                                                                        |
|                               | Correlation between data sets        |                                                                                                                                                                                                                                                                                                                                                                                                                                                                                                                                                                                                                                                                                                                                                                                                                                                                                                                                                                                                                                                                                                                                                                                                                                         |
| ....the lab environment       | SOPs                                 | <ul style="list-style-type: none"> <li>Standardized and validated <i>working practices</i> were in place for ELISpot assays, data evaluation and data storage</li> <li>Only well trained personnel with more than five years' experience with all methods and technologies performed the experiments and data analyses as well as interpreted and reported results;</li> </ul>                                                                                                                                                                                                                                                                                                                                                                                                                                                                                                                                                                                                                                                                                                                                                                                                                                                          |
|                               | Qualification/ Training of personnel |                                                                                                                                                                                                                                                                                                                                                                                                                                                                                                                                                                                                                                                                                                                                                                                                                                                                                                                                                                                                                                                                                                                                                                                                                                         |
| <b>pHLA Multimer staining</b> |                                      |                                                                                                                                                                                                                                                                                                                                                                                                                                                                                                                                                                                                                                                                                                                                                                                                                                                                                                                                                                                                                                                                                                                                                                                                                                         |
| ....the assay                 | evMultimer                           | <ul style="list-style-type: none"> <li><i>ex vivo</i> (ev) peptide/HLA-multimer staining procedure is described in the Methods section; between 3.4 and 9 million cells (median: 6.8 million cells) were used; responses are summarized in Figure 2A; representative staining examples are shown in Supplementary Figure 3B</li> <li><i>in vitro stimulated</i> (ivs) peptide/HLA-multimer staining is also described in Methods</li> <li>Reagents: peptide-HLA-tetramers for HLA-A1, A2 or A3 (Beckman Coulter, Krefeld, Germany) or PE-labeled peptide-HLA-dextramers for HLA-A24 and B7 (Immudex, Copenhagen, Denmark), surface-staining antibodies (CD8-PerCP, CD45RA-PE-Cy7, CD3-APC-H7, CD4-V450 and CCR7-AlexaFluor647 from BD and CD14-PacificOrange from Invitrogen), fix/perm solution and perm/wash (both eBioscience, Frankfurt a.M., Germany), intracellular staining antibody Granzyme B-FITC (BD), assay medium was RPMI1640 with 10% pooled human serum (both from Lonza), gentamicin, pyruvate and non-essential amino acids (Biochrome). EMD640744 and single peptides were supplied by the sponsor; media and sera were pretested for performance;</li> <li>Cell incubators, centrifuges and laminar flow</li> </ul> |
|                               | ivsMultimer                          |                                                                                                                                                                                                                                                                                                                                                                                                                                                                                                                                                                                                                                                                                                                                                                                                                                                                                                                                                                                                                                                                                                                                                                                                                                         |
|                               | Reagents                             |                                                                                                                                                                                                                                                                                                                                                                                                                                                                                                                                                                                                                                                                                                                                                                                                                                                                                                                                                                                                                                                                                                                                                                                                                                         |
|                               | Materials/ Equipment                 |                                                                                                                                                                                                                                                                                                                                                                                                                                                                                                                                                                                                                                                                                                                                                                                                                                                                                                                                                                                                                                                                                                                                                                                                                                         |

|                         |                                                                        |                                                                                                                                                                                                                                                                                                                                                                                                                                                                                                                                                                                                                                                                                                                                                                                                                                                                                                                                                                                                              |
|-------------------------|------------------------------------------------------------------------|--------------------------------------------------------------------------------------------------------------------------------------------------------------------------------------------------------------------------------------------------------------------------------------------------------------------------------------------------------------------------------------------------------------------------------------------------------------------------------------------------------------------------------------------------------------------------------------------------------------------------------------------------------------------------------------------------------------------------------------------------------------------------------------------------------------------------------------------------------------------------------------------------------------------------------------------------------------------------------------------------------------|
|                         |                                                                        | cabinets were state-of-the-art devices for the sterile handling of human cell material                                                                                                                                                                                                                                                                                                                                                                                                                                                                                                                                                                                                                                                                                                                                                                                                                                                                                                                       |
| ....data acquisition    | Machines/<br>Software<br><br>Calibration<br><br>Gating                 | <ul style="list-style-type: none"> <li>• All Flow Cytometry assays were acquired on a FACS Canto II Flow Cytometer (BD Biosciences) equipped with FACS Diva software; for Flow Cytometry analyses, FlowJo 9.5 was used;</li> <li>• the FACS Canto II Flow Cytometer was calibrated according to the manufacturers recommendations on a regular basis (CS&amp;T Performance Check on every day of usage);</li> <li>• For basic fitting of gates FMO (fluorescence minus one) controls were used; in addition, control cells (stimulated PBMC from healthy donors frozen in aliquots) were used as external references. The gating strategy is shown in Supplementary Figure 3A</li> </ul>                                                                                                                                                                                                                                                                                                                     |
| ....results             | Response criteria<br><br>Auditing<br><br>Correlation between data sets | <ul style="list-style-type: none"> <li>• Standard cut-off criteria for a positive response by pHLA-multimer staining were a minimum of 50 cells detected in the multimer-gate <u>and</u> a minimum percentage of 0.03% of the CD8+ T cells. In 8 patients smaller numbers of cells, just below the cut-off criteria were detected in the multimer gate in the evMultimer analysis but formed clear and well separated populations and were in 7 of 8 patients confirmed by ivsMultimer assays. Therefore after auditing those results were also considered positive.</li> <li>• All dotplots were audited and cells within the multimer gate were checked by backgating</li> <li>• Since objective clinical response rates are generally low after cancer vaccination, clinical efficacy can only be reasonably assessed in an appropriately designed trial with a time-to-event endpoint. Therefore, a formal analysis to correlate clinical efficacy with immunologic efficacy was not planned.</li> </ul> |
| ....the lab environment | SOPs<br><br>Qualification/<br>Training of personnel                    | <ul style="list-style-type: none"> <li>• Standardized and validated <i>working practices</i> were in place for evMultimer and ivsMultimer assays, data acquisition and analysis</li> <li>• Only well trained personnel with more than five years' experience with all methods and technologies performed the experiments and data analyses as well as interpreted and reported results;</li> </ul>                                                                                                                                                                                                                                                                                                                                                                                                                                                                                                                                                                                                           |

Raw data are not accessible in general; however, all raw data have been reported to health authorities according to established regulations.

| Restricting HLA allele | Peptide designation / amino acid substitution | Amino acid sequence* | References |
|------------------------|-----------------------------------------------|----------------------|------------|
| A1                     | Sur93-101/T2                                  | F <u>I</u> ELTLGEF   | [1]        |
| A2                     | Sur96-104/M2                                  | L <u>M</u> LGEFLKL   | [2, 3]     |
| A3                     | Sur18-27/K10                                  | RISTFKNW <u>P</u> K  | [1]        |
| A24                    | Sur20-28                                      | STFKNWPFL            | [4]        |
| B7                     | Sur6-14                                       | LPPAWQPFL            | [5]        |

\*The underlined amino acids are mutated and do not correspond to naturally-occurring survivin

Supplementary Table 1: Peptides in EMD640744 and the respective restricting HLA alleles in the human population

#### References

1. Reker S, Meier A, Holten-Andersen L, Svane IM, Becker JC, thor Straten P, Andersen MH (2004). Identification of novel survivin derived CTL epitopes. *Cancer Biol Ther* 3:173-179.
2. Andersen MH, Pedersen LO, Becker JC, Straten PT (2001) Identification of a cytotoxic T lymphocyte response to the apoptosis inhibitor protein survivin in cancer patients. *Cancer Res* 61:869-72.
3. Andersen MH, Pedersen LO, Capeller B, Bröcker EB, Becker JC, thor Straten P (2001) Spontaneous cytotoxic T-cell responses against survivin-derived MHC class I-restricted T-cell epitopes in situ as well as ex vivo in cancer patients. *Cancer Res* 61:5964-8.
4. Andersen MH, Soerensen RB, Becker JC, thor Straten P (2006) HLA-A24 and survivin: possibilities in therapeutic vaccination against cancer. *J Trans Med* 4:38-41.
5. Survivin-derived peptides and use thereof. US 20070148184 A1  
<http://www.google.co.in/patents/US8318174>

## Inclusion criteria

- Histologically or cytologically documented metastatic or locally advanced survivin-expressing solid tumor for which no established therapy exists
- Disease measurable by RECIST criteria or evaluable by clinical, radiographic, or laboratory criteria established for the given tumor entity
- Expressing  $\geq 1$  of the following HLA alleles: HLA-A1, -A2, -A3, -A24, and -B7
- ECOG performance status  $\leq 1$  and estimated life expectancy of  $\geq 3$  months
- Adequate:
  - hematologic function (WBC  $\geq 3 \times 10^9/L$ , lymphocyte count  $\geq 0.5 \times 10^9/L$ , hemoglobin  $\geq 10$  g/dL, and platelet count  $\geq 100 \times 10^9/L$ )
  - blood coagulation parameters (aPTT and INR  $\leq 1.5 \times$  ULN)
  - renal function (serum creatinine  $\leq 2 \times$  ULN)
  - hepatic function (total bilirubin  $\leq 2 \times$  ULN, and AST and ALT levels  $\leq 2.5 \times$  ULN [or  $\leq 5 \times$  ULN in subjects with liver metastases])
- Effective contraception for female and male subjects if the risk of conception existed
- $\geq 18$  years of age

## Exclusion criteria

- Treatment in another clinical trial within the past 30 days prior to the first administration of trial treatment
- Previous treatment with an investigational anticancer vaccine
- Requirement for concurrent treatment with a non-permitted drug\*
- Receipt of allogeneic stem cell transplantation
- Active significant autoimmune disease (with the exception of vitiligo)
- Radiotherapy, chemotherapy, surgery (excluding prior diagnostic biopsy), immunotherapy, or any investigational drug within 30 days before the start of trial treatment
- Primary brain tumors and brain metastases\*\*
- Rapidly progressive disease (e.g. tumor lysis syndrome)
- Significant acute or chronic infections (e.g. viral hepatitis, HIV)
- Pregnancy or lactation
- Active drug or alcohol abuse
- Known hypersensitivity to the trial treatment or any of its components
- Any significant disease requiring exclusion in the investigator's opinion
- Persisting toxicity to prior therapy at Grade  $\geq 2$  (NCI-CTCAE version 3.0)

\*Including immunotherapy, immunosuppressive drugs, growth factors, oral anticoagulants. \*\*Except brain metastases that are stable after irradiation or surgically-resected brain metastases if subjects had been asymptomatic for  $\geq 6$  months.

ALT: alanine aminotransferase; aPTT: activated partial thromboplastin time; AST: aspartate aminotransferase; ECOG: Eastern Cooperative Oncology Group; INR: international normalized ratio; NCI-CTCAE: Common Terminology Criteria for Adverse Events; RECIST: Response Evaluation Criteria In Solid Tumors; ULN: upper limit of normal; WBC: white blood cell count.

| Analysis set            | 30 µg |         | 100 µg |         | 300 µg |         | Total |         |
|-------------------------|-------|---------|--------|---------|--------|---------|-------|---------|
|                         | N     | (%)     | N      | (%)     | N      | (%)     | N     | (%)     |
| Randomized subjects     | 17    |         | 17     |         | 17     |         | 51    |         |
| Safety/ITT analysis set | 19    | (100.0) | 17     | (100.0) | 17     | (100.0) | 53    | (100.0) |
| ID analysis set         | 12    | (63.2)  | 13     | (76.5)  | 13     | (76.5)  | 38    | (71.7)  |
| ID-ITT analysis set     | 15    | (78.9)  | 17     | (100.0) | 17     | (100.0) | 49    | (92.5)  |

Supplementary Table 3: Analysis sets



| Characteristic           | 30 µg (N=19)        |        | 100 µg (N=17)       |        | 300 µg (N=17)       |        | Total (N=53)        |        |
|--------------------------|---------------------|--------|---------------------|--------|---------------------|--------|---------------------|--------|
|                          | N                   | (%)    | N                   | (%)    | N                   | (%)    | N                   | (%)    |
| <b>Sex</b>               |                     |        |                     |        |                     |        |                     |        |
| Male                     | 11                  | (57.9) | 10                  | (58.8) | 10                  | (58.8) | 31                  | (58.5) |
| Female                   | 8                   | (42.1) | 7                   | (41.2) | 7                   | (41.2) | 22                  | (41.5) |
| <b>Age (years)</b>       |                     |        |                     |        |                     |        |                     |        |
| Mean (SD)                | 55.9 (9.92)         |        | 58.7 (11.07)        |        | 53.8 (14.67)        |        | 56.1 (11.92)        |        |
| Median (Q1–Q3)           | 56.0 (49.3–63.2)    |        | 60.0 (53.0–64.9)    |        | 58.2 (50.0–61.6)    |        | 57.7 (50.9–63.4)    |        |
| Range                    | 38–71               |        | 36–80               |        | 20–79               |        | 20–80               |        |
| <b>Age category</b>      |                     |        |                     |        |                     |        |                     |        |
| <65 years                | 15                  | (78.9) | 13                  | (76.5) | 15                  | (88.2) | 43                  | (81.1) |
| ≥65 years                | 4                   | (21.1) | 4                   | (23.5) | 2                   | (11.8) | 10                  | (18.9) |
| <b>Height (CM)</b>       |                     |        |                     |        |                     |        |                     |        |
| Mean (SD)                | 172.5 (10.02)       |        | 170.5 (9.43)        |        | 170.2 (9.89)        |        | 171.2 (9.63)        |        |
| Median (Q1–Q3)           | 171.5 (167.0–179.0) |        | 170.0 (167.0–180.0) |        | 165.5 (164.0–179.0) |        | 170.0 (165.0–179.0) |        |
| <b>Weight (kg)</b>       |                     |        |                     |        |                     |        |                     |        |
| Mean (SD)                | 68.16 (16.085)      |        | 71.31 (12.055)      |        | 71.72 (12.535)      |        | 70.31 (13.612)      |        |
| Median (Q1–Q3)           | 65.00 (58.00–76.00) |        | 71.00 (60.00–80.00) |        | 74.00 (59.50–82.00) |        | 70.00 (59.00–80.00) |        |
| <b>Body surface area</b> |                     |        |                     |        |                     |        |                     |        |
| Mean (SD)                | 1.814 (0.2285)      |        | 1.848 (0.1677)      |        | 1.789 (0.2117)      |        | 1.819 (0.2022)      |        |
| Median (Q1–Q3)           | 1.805 (1.678–1.899) |        | 1.883 (1.716–1.980) |        | 1.699 (1.626–1.988) |        | 1.805 (1.671–1.959) |        |
| <b>ECOG PS</b>           |                     |        |                     |        |                     |        |                     |        |
| 0                        | 16                  | (84.2) | 11                  | (64.7) | 15                  | (88.2) | 42                  | (79.2) |
| 1                        | 3                   | (15.8) | 6                   | (35.3) | 2                   | (11.8) | 11                  | (20.8) |

Supplementary Table 4: Demographic characteristics (Safety / ITT analysis set)

| HLA allele | 30 µg (N=19) |        | 100 µg (N=17) |        | 300 µg (N=17) |        | Total (N=53) |        |
|------------|--------------|--------|---------------|--------|---------------|--------|--------------|--------|
|            | N            | (%)    | N             | (%)    | N             | (%)    | N            | (%)    |
| A1         | 6            | (31.6) | 6             | (35.3) | 6             | (35.3) | 18           | (34.0) |
| A2         | 13           | (68.4) | 11            | (64.7) | 10            | (58.8) | 34           | (64.2) |
| A3         | 5            | (26.3) | 5             | (29.4) | 3             | (17.6) | 13           | (24.5) |
| A24        | 2            | (10.5) | 3             | (17.6) | 3             | (17.6) | 8            | (15.1) |
| B7         | 6            | (31.6) | 3             | (17.6) | 2             | (11.8) | 11           | (20.8) |

Supplementary Table 5: Presence of survivin peptide-presenting HLA class I alleles in the different dose groups (Safety / ITT analysis set)

| Patient | Gender | Age | HLA type      | Dose group | Tumor                 |
|---------|--------|-----|---------------|------------|-----------------------|
| C01P002 | Male   | 56  | A01, A03, B07 | 30 µg      | Urothelial cancer     |
| C01P007 | Female | 67  | A03           | 100 µg     | Colorectal cancer     |
| C01P008 | Male   | 57  | A02           | 300 µg     | Colorectal cancer     |
| C01P009 | Female | 67  | A01, A02      | 30 µg      | Colorectal cancer     |
| C01P012 | Male   | 62  | A02           | 300 µg     | Colorectal cancer     |
| C01P013 | Male   | 36  | A02           | 100 µg     | Sarcoma               |
| C01P015 | Male   | 51  | B07           | 30 µg      | Renal cancer          |
| C01P016 | Female | 28  | A02           | 300 µg     | Ovarian cancer        |
| C01P017 | Female | 63  | A01           | 30 µg      | Adenoid cystic cancer |
| C01P018 | Female | 55  | A01, A02      | 100 µg     | Breast cancer         |
| C01P024 | Male   | 79  | A01           | 300 µg     | Colorectal cancer     |
| C01P027 | Male   | 60  | A03           | 300 µg     | Mesothelioma          |
| C01P028 | Female | 44  | A01, A03, B07 | 30 µg      | Ovarian cancer        |
| C01P029 | Female | 67  | A02, A03      | 100 µg     | Ovarian cancer        |
| C01P032 | Female | 69  | A02           | 30 µg      | Ovarian cancer        |
| C01P033 | Female | 51  | A02           | 100 µg     | Melanoma              |
| C01P035 | Male   | 58  | A02, A24      | 30 µg      | Head and neck cancer  |
| C01P037 | Female | 58  | A02           | 300 µg     | Ovarian cancer        |
| C01P040 | Male   | 45  | A02           | 30 µg      | Mesothelioma          |
| C02P003 | Male   | 62  | A01, A02      | 30 µg      | Melanoma              |
| C02P004 | Male   | 63  | A03           | 30 µg      | Colorectal cancer     |
| C02P007 | Female | 53  | A03           | 300 µg     | Melanoma              |
| C02P010 | Female | 43  | A02           | 30 µg      | Melanoma              |
| C03P001 | Male   | 65  | A24, B07      | 100 µg     | Sarcoma               |
| C03P002 | Female | 49  | A03           | 30 µg      | NSCLC                 |
| C03P005 | Male   | 51  | A02, B07      | 30 µg      | NSCLC                 |
| C03P009 | Female | 20  | A02           | 300 µg     | Melanoma              |
| C03P012 | Male   | 71  | A01, A24, B07 | 100 µg     | Colorectal cancer     |
| C03P014 | Female | 53  | A02           | 100 µg     | Breast cancer         |
| C03P015 | Male   | 65  | A02           | 100 µg     | Colorectal cancer     |
| C03P016 | Male   | 71  | A01, A02      | 30 µg      | Colorectal cancer     |
| C03P017 | Male   | 38  | A01, A02      | 100 µg     | Testicular cancer     |
| C03P019 | Male   | 34  | A02           | 300 µg     | Sarcoma               |
| C03P020 | Male   | 55  | A01, A02      | 100 µg     | Melanoma              |
| C03P021 | Male   | 52  | A01           | 100 µg     | Head and neck cancer  |
| C04P004 | Female | 68  | A02, B07      | 300 µg     | Mesothelioma          |
| C04P005 | Male   | 60  | A02, A03, B07 | 100 µg     | NSCLC                 |
| C04P007 | Male   | 58  | A03           | 100 µg     | Mesothelioma          |
| C04P012 | Female | 64  | A02, A24      | 100 µg     | NSCLC                 |
| C04P013 | Male   | 52  | A01, A03      | 300 µg     | Melanoma              |
| C04P014 | Male   | 68  | A02, A03, B07 | 30 µg      | Thymoma               |
| C04P015 | Male   | 80  | A02           | 100 µg     | Adenoid cystic cancer |
| C04P016 | Female | 59  | A02           | 300 µg     | Colorectal cancer     |
| C05P002 | Female | 61  | A01, A03      | 100 µg     | Ovarian cancer        |
| C05P005 | Female | 63  | A01           | 300 µg     | Ovarian cancer        |
| C05P011 | Male   | 51  | A24           | 300 µg     | Neuroendocrine tumor  |
| C05P012 | Male   | 61  | A01, A24, B07 | 300 µg     | Melanoma              |
| C05P014 | Male   | 47  | A01, A02      | 300 µg     | Melanoma              |
| C05P017 | Male   | 63  | A01, A02      | 300 µg     | Neuroendocrine tumor  |

Supplementary Table 6: Patient demographics, HLA type and tumor entity

| Best response       | 30 µg (N=19) |        | 100 µg (N=17) |        | 300 µg (N=17) |        | Total (N=53) |        |
|---------------------|--------------|--------|---------------|--------|---------------|--------|--------------|--------|
|                     | N            | (%)    | N             | (%)    | N             | (%)    | N            | (%)    |
| Complete response   | 0            | –      | 0             | –      | 0             | –      | 0            | –      |
| Partial response    | 0            | –      | 0             | –      | 0             | –      | 0            | –      |
| Stable disease      | 4            | (21.1) | 5             | (29.4) | 6             | (35.3) | 15           | (28.3) |
| Progressive disease | 11           | (57.9) | 9             | (52.9) | 9             | (52.9) | 29           | (54.7) |
| Not evaluable       | 4            | (21.1) | 3             | (17.6) | 2             | (11.8) | 9            | (17.0) |

Supplementary Table 7: Best overall response within distinct dose groups  
(Safety / ITT analysis set)

| MedDRA SOC                                           | 30 µg (N=19) |        | 100 µg (N=17) |        | 300 µg (N=17) |        | Total (N=53) |        |
|------------------------------------------------------|--------------|--------|---------------|--------|---------------|--------|--------------|--------|
|                                                      | N            | (%)    | N             | (%)    | N             | (%)    | N            | (%)    |
| General disorders and administration site conditions | 15           | (78.9) | 13            | (76.5) | 15            | (88.2) | 43           | (81.1) |
| Gastrointestinal disorders                           | 11           | (57.9) | 9             | (52.9) | 10            | (58.8) | 30           | (56.6) |
| Musculoskeletal and connective tissue disorders      | 7            | (36.8) | 6             | (35.3) | 6             | (35.3) | 19           | (35.8) |
| Respiratory, thoracic and mediastinal disorders      | 10           | (52.6) | 3             | (17.6) | 4             | (23.5) | 17           | (32.1) |
| Skin and subcutaneous tissue disorders               | 7            | (36.8) | 3             | (17.6) | 4             | (23.5) | 14           | (26.4) |
| Metabolism and nutrition disorders                   | 4            | (21.1) | 4             | (23.5) | 4             | (23.5) | 12           | (22.6) |
| Nervous system disorders                             | 3            | (15.8) | 5             | (29.4) | 4             | (23.5) | 12           | (22.6) |
| Infections and infestations                          | 6            | (31.6) | 2             | (11.8) | 3             | (17.6) | 11           | (20.8) |
| Investigations                                       | 3            | (15.8) | 4             | (23.5) | 4             | (23.5) | 11           | (20.8) |
| Blood and lymphatic system disorders                 | 3            | (15.8) | 1             | (5.9)  | 2             | (11.8) | 6            | (11.3) |
| Neoplasms benign, malignant and unspecified          | 1            | (5.3)  | 3             | (17.6) | 1             | (5.9)  | 5            | (9.4)  |
| Psychiatric disorders                                | 1            | (5.3)  | 2             | (11.8) | 2             | (11.8) | 5            | (9.4)  |
| Vascular disorders                                   | 2            | (10.5) | 1             | (5.9)  | 1             | (5.9)  | 4            | (7.5)  |
| Hepatobiliary disorders                              | 0            | -      | 0             | -      | 2             | (11.8) | 2            | (3.8)  |

Supplementary Table 8: Incidence of TEAEs by MedDRA system organ class (Safety / ITT analysis set; ≥10% incidence in any group)

| MedDRA PT                                            | 30 µg (N=19) |        | 100 µg (N=17) |        | 300 µg (N=17) |        | Total (N=53) |        |
|------------------------------------------------------|--------------|--------|---------------|--------|---------------|--------|--------------|--------|
|                                                      | N            | (%)    | N             | (%)    | N             | (%)    | N            | (%)    |
| Gastrointestinal disorders                           | 0            | -      | 1             | (5.9)  | 0             | -      | 1            | (1.9)  |
| Nausea                                               | 0            | -      | 1             | (5.9)  | 0             | -      | 1            | (1.9)  |
| General disorders and administration site conditions | 11           | (57.9) | 10            | (58.8) | 11            | (64.7) | 32           | (60.4) |
| Asthenia                                             | 0            | -      | 1             | (5.9)  | 0             | -      | 1            | (1.9)  |
| Chills                                               | 0            | -      | 0             | -      | 1             | (5.9)  | 1            | (1.9)  |
| Fatigue                                              | 1            | (5.3)  | 1             | (5.9)  | 2             | (11.8) | 4            | (7.5)  |
| Granuloma                                            | 0            | -      | 0             | -      | 1             | (5.9)  | 1            | (1.9)  |
| Induration                                           | 1            | (5.3)  | 1             | (5.9)  | 0             | -      | 2            | (3.8)  |
| Injection site erythema                              | 0            | -      | 0             | -      | 1             | (5.9)  | 1            | (1.9)  |
| Injection site hematoma                              | 1            | (5.3)  | 0             | -      | 0             | -      | 1            | (1.9)  |
| Injection site induration                            | 2            | (10.5) | 3             | (17.6) | 5             | (29.4) | 10           | (18.9) |
| Injection site nodule                                | 1            | (5.3)  | 0             | -      | 1             | (5.9)  | 2            | (3.8)  |
| Injection site pain                                  | 3            | (15.8) | 1             | (5.9)  | 2             | (11.8) | 6            | (11.3) |
| Injection site pruritus                              | 1            | (5.3)  | 0             | -      | 2             | (11.8) | 3            | (5.7)  |
| Injection site reaction                              | 4            | (21.1) | 5             | (29.4) | 2             | (11.8) | 11           | (20.8) |
| Injection site swelling                              | 0            | -      | 0             | -      | 1             | (5.9)  | 1            | (1.9)  |
| Pyrexia                                              | 0            | -      | 1             | (5.9)  | 0             | -      | 1            | (1.9)  |
| Vaccination site induration                          | 0            | -      | 0             | -      | 1             | (5.9)  | 1            | (1.9)  |
| Hepatobiliary disorders                              | 0            | -      | 0             | -      | 1             | (5.9)  | 1            | (1.9)  |
| Hepatic pain                                         | 0            | -      | 0             | -      | 1             | (5.9)  | 1            | (1.9)  |
| Musculoskeletal and connective tissue disorders      | 2            | (10.5) | 2             | (11.8) | 2             | (11.8) | 6            | (11.3) |
| Muscular weakness                                    | 0            | -      | 1             | (5.9)  | 0             | -      | 1            | (1.9)  |
| Musculoskeletal chest pain                           | 0            | -      | 0             | -      | 1             | (5.9)  | 1            | (1.9)  |
| Nodule on extremity                                  | 0            | -      | 0             | -      | 1             | (5.9)  | 1            | (1.9)  |
| Pain in extremity                                    | 2            | (10.5) | 2             | (11.8) | 0             | -      | 4            | (7.5)  |
| Tendonitis                                           | 0            | -      | 1             | (5.9)  | 0             | -      | 1            | (1.9)  |
| Renal and urinary disorders                          | 0            | -      | 0             | -      | 1             | (5.9)  | 1            | (1.9)  |
| Polyuria                                             | 0            | -      | 0             | -      | 1             | (5.9)  | 1            | (1.9)  |
| Renal failure                                        | 0            | -      | 0             | -      | 1             | (5.9)  | 1            | (1.9)  |

Supplementary Table 9: Incidence of treatment-related TEAEs by MedDRA PT (Safety / ITT analysis set)

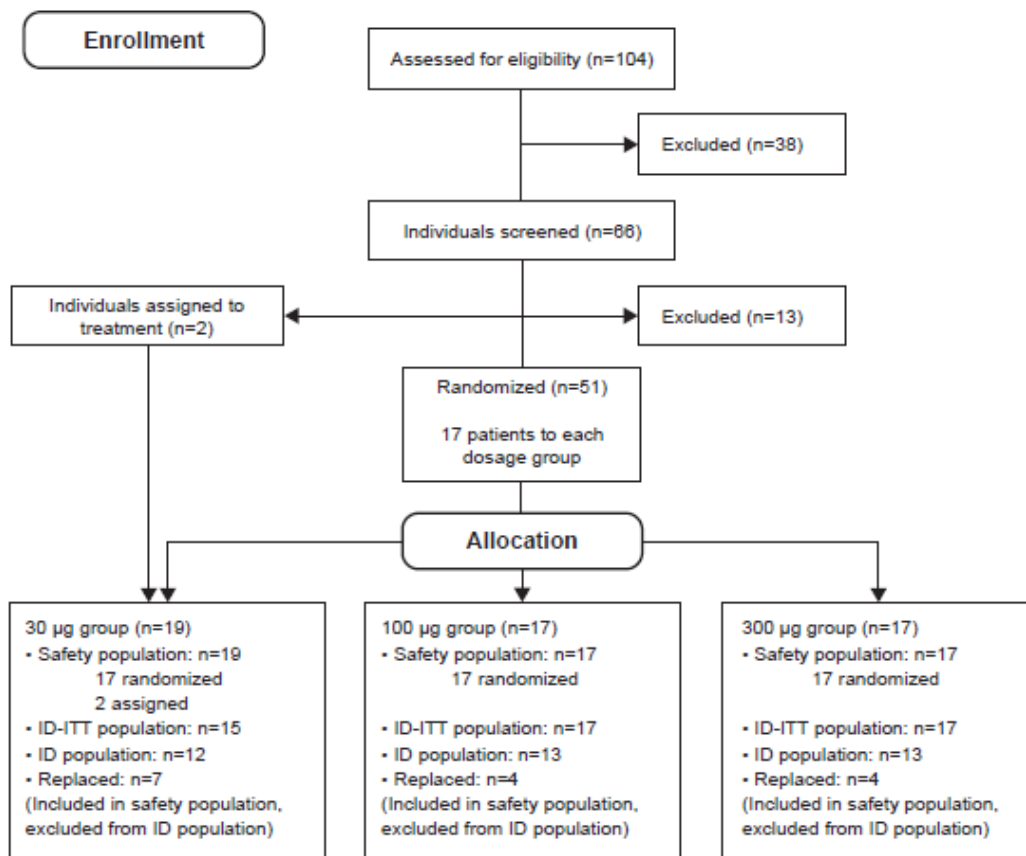

Supplementary Figure 1: Patient disposition

A

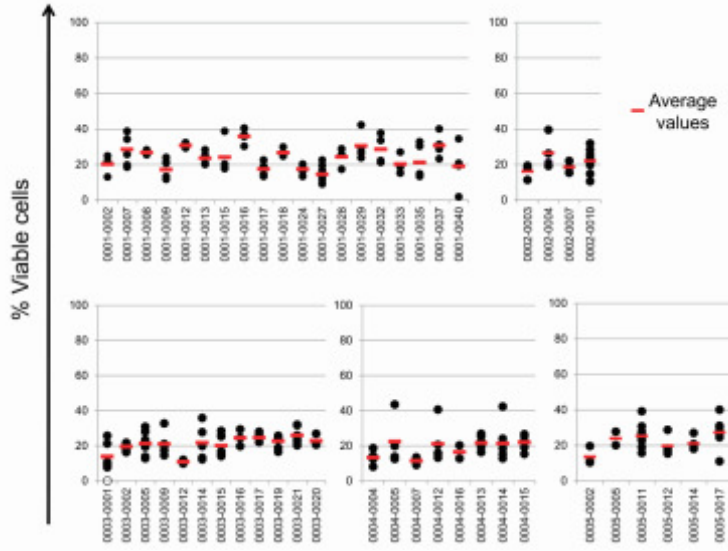

B

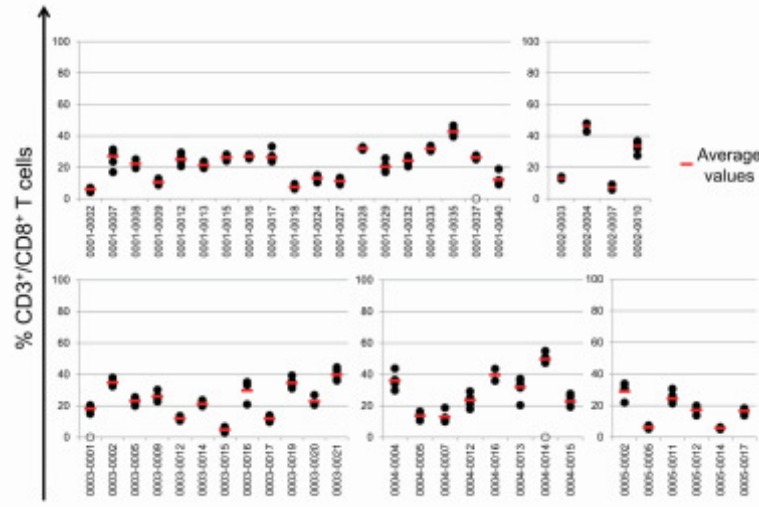

C

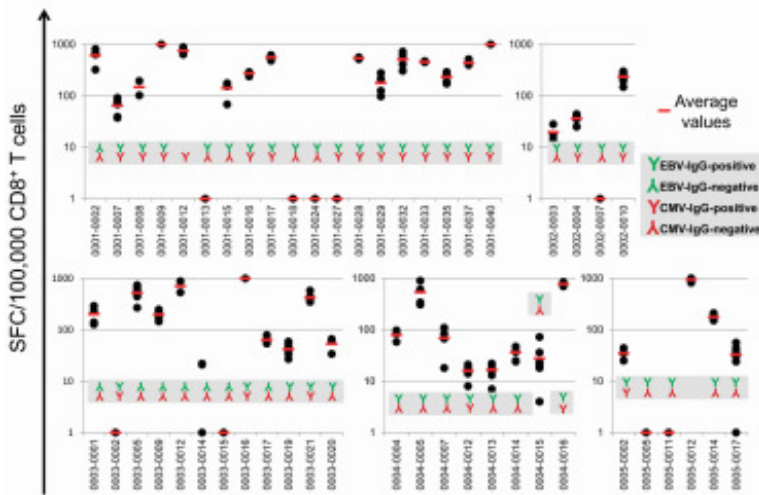

Supplementary Figure 2: Representative example data for controls of ELISpot assays. (A) After thawing of PBMC samples and overnight incubation for the setting up of ELISpot assays, cell yield and viability were determined by microscopy with trypan blue staining. (B) All PBMC samples tested by evELISpots were analyzed by flow cytometry to determine the proportion of CD3<sup>+</sup>/CD8<sup>+</sup> T cells per sample. (C) In all evELISpot assays, T cell memory responses to a cocktail of CMV- and EBV-peptides (CEmix) were tested as a positive control. Antibody symbols depict the results of the CMV-/EBV-serology that was done for all patients in the centers where the patients were treated. Missing symbols mean that the serology was not done. SFC, spot-forming cells.



**A**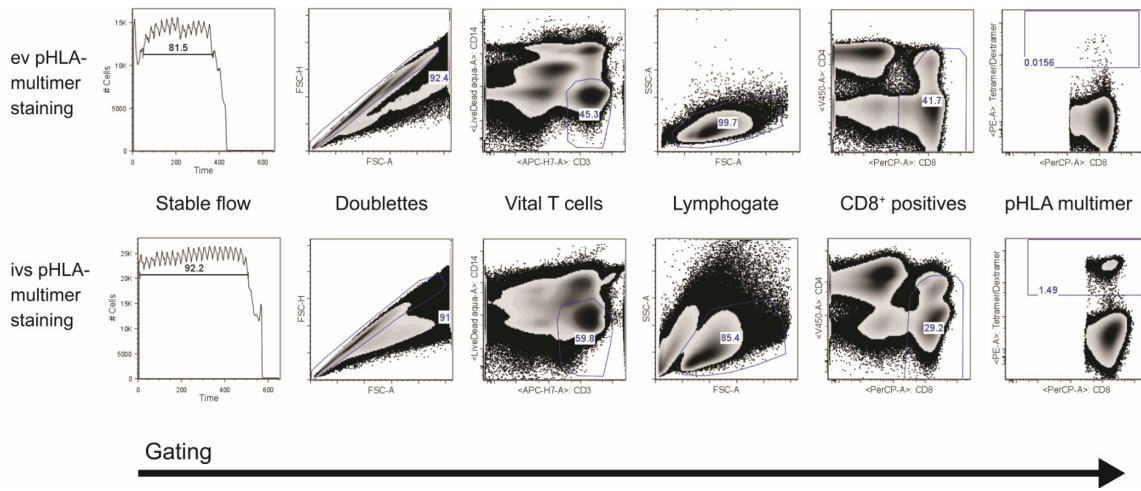**B**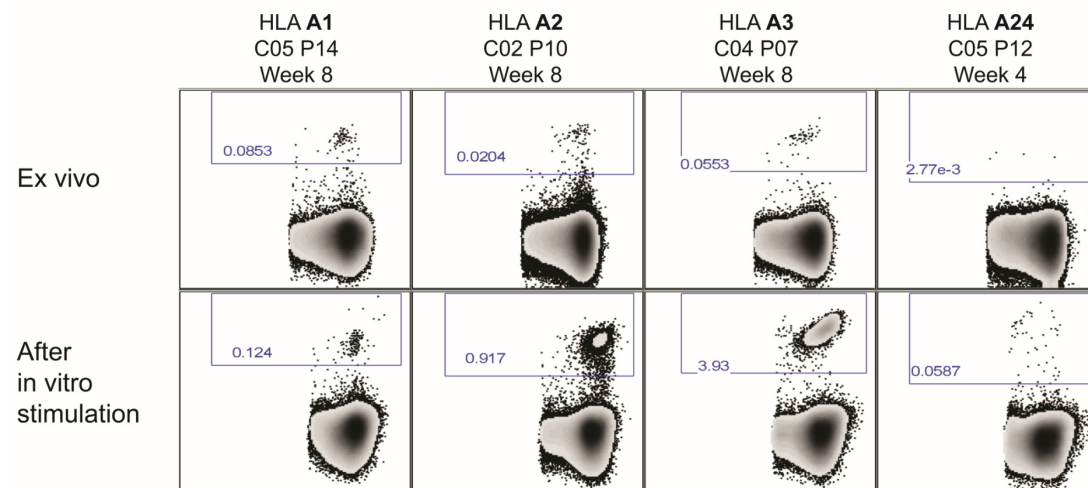

Supplementary Figure 3: Examples of staining and the gating strategy.
